# Supplementary material for: A premixed magnesium phosphate-based sealer with anti-biofilm ability for root canal filling
Source: Royal Society of Chemistry journal article supplement (doi:10.1039/d3tb00375b), 2023-01-01
Supplement: d3tb00375b1.pdf [file d3tb00375b1.pdf]

## Support Information

### Premixed magnesium phosphate based sealer with anti-biofilm ability for root canal filling

Dongjing Xu , Jiawei Liu , Honglian Dai , Jinyong Zhang , Wen Hou , Xiaopei Wu , Yanan Zhao

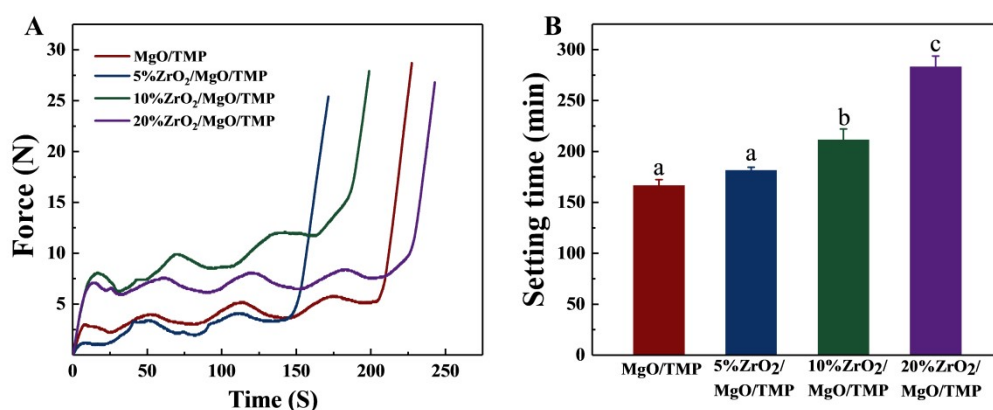

Fig.S1.Properties of premixed sealers with different ZrO<sub>2</sub> incorporation:(A) Force of the syringe containing the sealers during injection;(B) Setting time of the sealers in water bath at 37°C and 100% humidity(n=3).

Dissimilar letters indicate values that are significantly different from each other (p < 0.05).

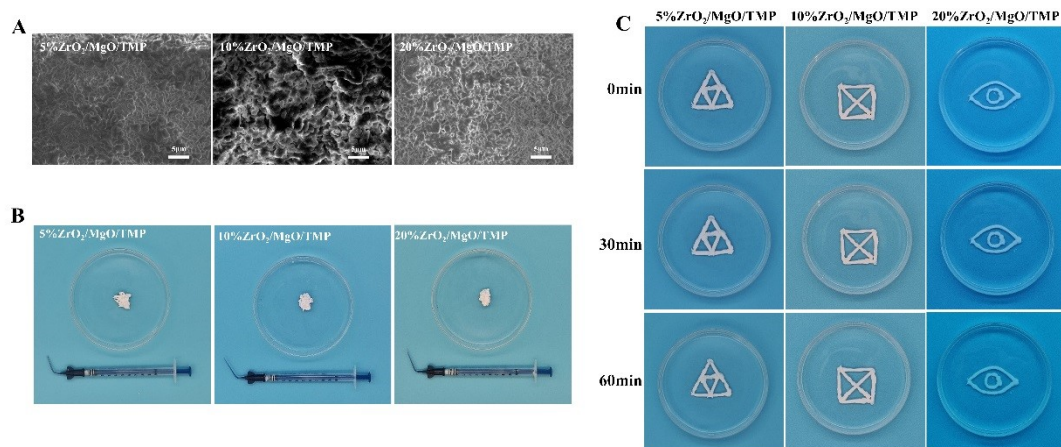

Fig.S2. Properties of the premixed sealers with addition of different amount of ZrO<sub>2</sub>. (A)SEM images of

fractured surface after curing under the environment of 37°C and 100% humidity for 3 days; (B)Injectability;

(C) Washout resistance test at 0min,30min,60min.

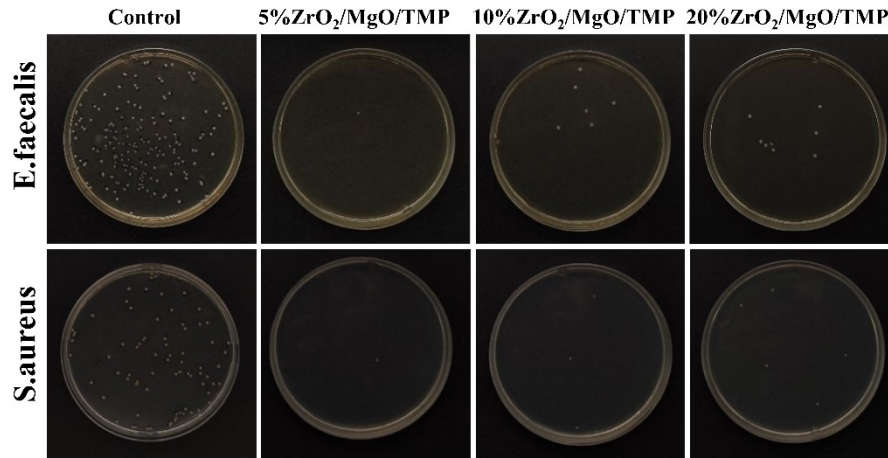

Fig.S3. Antibacterial effect in vitro: photographs of S.Aureus and E.faecalis colonies on BHI agar.

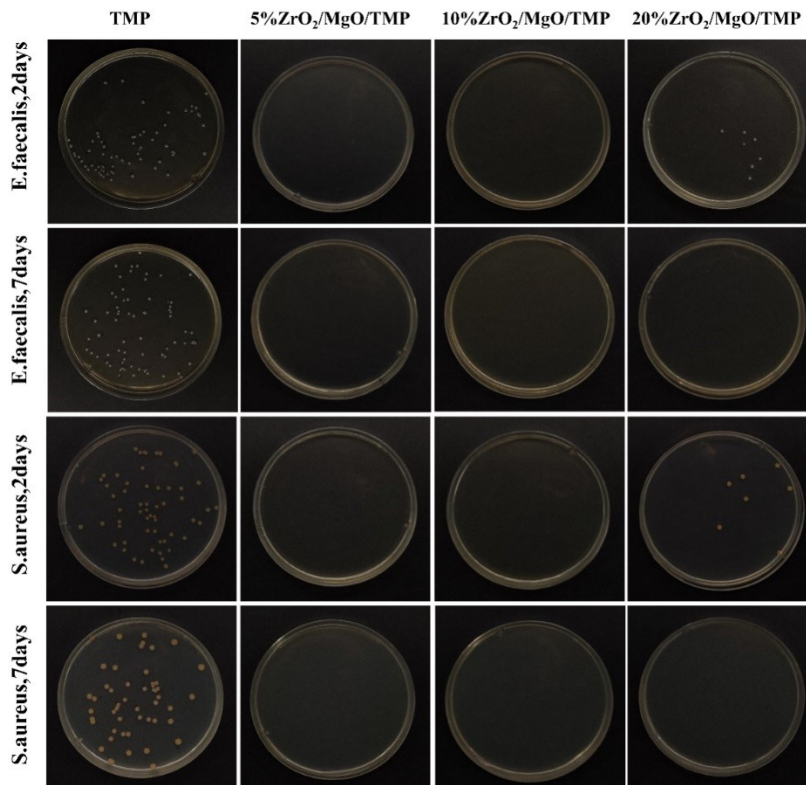

Fig.S4. Inhibition effect of the sealers on biofilm formation: Photographs of S.Aureus and E.faecalis colonies

on BHI agar, bacteria were harvested from the surface of the cured sealer immersed in bacterial suspension.

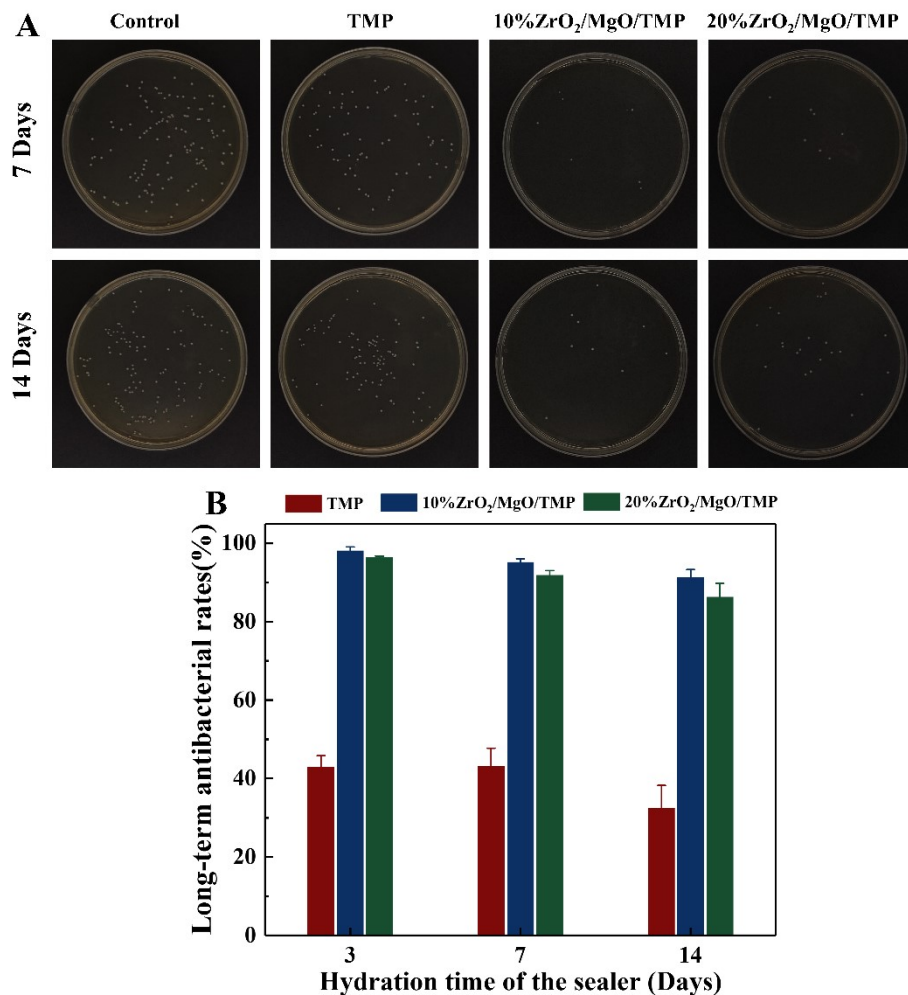

Fig.S5. Long-term antibacterial effect of the sealers. (A)Photographs of *E.faecalis* colonies on BHI agar, bacteria were co-cultured with sealers of different hydration times for 24h; (B)Long-term antibacterial rates of sealers with different componets, the antibacterial rate on 3 days was derived from Fig.3B and Fig.5E(n=3).

Table.S1: pH changes of PBS solution contained cured sealer with different components (0.2 g/mL)

| Time (Days)                  | 1     | 3     | 7     | 14    | Two days after the PBS replaced |
|------------------------------|-------|-------|-------|-------|---------------------------------|
| TMP                          | 8.99  | 8.98  | 9.02  | 9.06  | 8.41                            |
| MgO/TMP                      | 12.12 | 12.27 | 12.38 | 12.42 | 11.31                           |
| 20%ZrO <sub>2</sub> /MgO/TMP | 12.18 | 12.25 | 12.27 | 12.33 | 11.19                           |
